# Supplementary material for: Low carbon transition of global power sector enhances sustainable development goals
Source: Research Square preprint supplement (doi:10.21203/rs.3.rs-1120662/v1), 2021-12-15
Supplement: Supplementary file 1 [file 01881015fc514edc9c5a018f.docx]

**Supplementary Information**

This file contains:

Table S1-S6

**Table S1 global and regional energy mix of electricity production in 2040 under CPS (TWh).**

| **Economies** | **Coal** | **Gas** | **Nuclear** | **Hydro** | **Wind** | **Petroleum** | **Biomass** | **PV** | **Solar thermal** | **Marine** | **Geothermal** |
| --- | --- | --- | --- | --- | --- | --- | --- | --- | --- | --- | --- |
| Austria | 1.80 | 11.93 | 0.00 | 44.77 | 15.41 | 0.20 | 7.66 | 2.47 | 0.00 | 0.00 | 0.00 |
| Belgium | 1.51 | 34.99 | 19.60 | 1.57 | 17.75 | 0.05 | 9.37 | 8.04 | 0.00 | 0.00 | 0.00 |
| Bulgaria | 7.98 | 2.85 | 11.55 | 6.79 | 4.62 | 0.04 | 0.46 | 3.64 | 0.00 | 0.00 | 0.00 |
| Cyprus | 0.00 | 0.00 | 0.00 | 0.00 | 0.71 | 0.95 | 0.09 | 0.33 | 0.00 | 0.00 | 0.00 |
| Czech Republic | 15.53 | 3.46 | 20.16 | 3.39 | 1.82 | 0.02 | 8.14 | 5.96 | 0.00 | 0.00 | 0.00 |
| Germany | 100.51 | 96.62 | 68.94 | 27.51 | 252.27 | 1.43 | 85.57 | 101.97 | 0.00 | 0.00 | 0.24 |
| Denmark | 2.52 | 2.79 | 0.00 | 0.02 | 45.01 | 0.07 | 7.13 | 1.59 | 0.00 | 0.00 | 0.00 |
| Estonia | 3.05 | 0.09 | 0.00 | 0.03 | 2.28 | 0.03 | 1.29 | 0.02 | 0.00 | 0.00 | 0.00 |
| Spain | 18.66 | 80.49 | 43.04 | 34.66 | 157.10 | 3.96 | 9.80 | 21.77 | 16.38 | 0.01 | 0.00 |
| Finland | 3.11 | 7.97 | 17.46 | 18.53 | 7.41 | 0.05 | 19.42 | 0.03 | 0.00 | 0.00 | 0.00 |
| France | 4.31 | 30.34 | 328.53 | 66.74 | 67.90 | 0.50 | 10.86 | 20.41 | 0.00 | 12.24 | 0.16 |
| Greece | 7.83 | 13.94 | 0.00 | 6.80 | 14.72 | 1.30 | 0.39 | 10.27 | 0.00 | 0.00 | 0.00 |
| Croatia | 0.82 | 1.84 | 0.00 | 7.24 | 2.54 | 0.05 | 0.45 | 0.15 | 0.00 | 0.00 | 0.00 |
| Hungary | 2.09 | 7.83 | 11.89 | 0.26 | 2.21 | 0.02 | 3.67 | 0.37 | 0.00 | 0.00 | 0.00 |
| Ireland | 2.62 | 18.96 | 0.00 | 1.21 | 20.93 | 0.09 | 0.81 | 0.01 | 0.00 | 0.00 | 0.00 |
| Italy | 16.08 | 169.96 | 0.00 | 51.89 | 47.28 | 3.07 | 32.98 | 60.41 | 0.04 | 0.01 | 11.01 |
| Lithuania | 0.00 | 3.04 | 0.00 | 1.13 | 2.58 | 0.06 | 0.76 | 0.19 | 0.00 | 0.00 | 0.00 |
| Luxembourg | 0.00 | 1.27 | 0.00 | 1.69 | 0.32 | 0.00 | 0.21 | 0.27 | 0.00 | 0.00 | 0.00 |
| Latvia | 0.00 | 4.23 | 0.00 | 2.06 | 0.47 | 0.00 | 1.31 | 0.00 | 0.00 | 0.00 | 0.00 |
| Malta | 0.00 | 0.00 | 0.00 | 0.00 | 0.00 | 0.28 | 0.01 | 0.25 | 0.00 | 0.00 | 0.00 |
| Netherlands | 15.07 | 71.35 | 3.06 | 0.10 | 24.05 | 0.33 | 8.39 | 2.92 | 0.00 | 0.05 | 0.00 |
| Poland | 47.10 | 9.80 | 0.00 | 2.69 | 34.58 | 0.49 | 17.11 | 0.15 | 0.00 | 0.00 | 0.00 |
| Portugal | 5.22 | 16.19 | 0.00 | 10.83 | 36.97 | 0.30 | 5.28 | 2.10 | 0.00 | 0.00 | 0.36 |
| Romania | 6.46 | 14.40 | 8.74 | 18.79 | 22.50 | 0.11 | 0.89 | 5.22 | 0.00 | 0.00 | 0.00 |
| Sweden | 0.45 | 0.66 | 42.32 | 83.35 | 51.81 | 0.06 | 18.30 | 0.26 | 0.00 | 0.00 | 0.00 |
| Slovenia | 1.56 | 0.61 | 4.24 | 4.52 | 0.02 | 0.00 | 0.46 | 0.72 | 0.00 | 0.00 | 0.00 |
| Slovakia | 1.18 | 2.45 | 11.38 | 4.57 | 0.02 | 0.09 | 2.83 | 1.33 | 0.00 | 0.00 | 0.00 |
| United Kingdom | 27.18 | 153.36 | 52.84 | 9.98 | 128.27 | 0.49 | 49.75 | 19.84 | 0.00 | 0.05 | 0.00 |
| United States | 902.44 | 1703.06 | 611.24 | 329.79 | 684.71 | 9.61 | 108.41 | 527.15 | 13.49 | 3.91 | 41.72 |
| Japan | 305.20 | 324.84 | 173.38 | 96.01 | 40.28 | 11.66 | 58.29 | 92.40 | 0.00 | 1.27 | 5.76 |
| China | 5448.79 | 1081.69 | 1014.00 | 1548.91 | 1390.43 | 2.55 | 316.63 | 1359.75 | 17.69 | 1.39 | 6.32 |
| Canada | 12.88 | 137.49 | 107.33 | 473.88 | 93.10 | 1.18 | 20.93 | 74.42 | 0.55 | 2.62 | 0.00 |
| South Korea | 467.20 | 215.94 | 157.62 | 10.09 | 14.90 | 3.90 | 6.40 | 65.49 | 0.00 | 5.55 | 0.00 |
| Brazil | 20.25 | 100.97 | 46.99 | 642.69 | 126.35 | 11.83 | 71.32 | 29.03 | 3.28 | 0.00 | 0.00 |
| India | 2822.47 | 384.01 | 215.21 | 260.71 | 401.97 | 17.53 | 97.27 | 670.53 | 3.49 | 0.60 | 1.00 |
| Mexico | 6.60 | 381.19 | 12.26 | 38.20 | 30.78 | 4.59 | 2.21 | 6.32 | 0.55 | 0.00 | 9.23 |
| Russia | 199.37 | 682.67 | 280.55 | 235.36 | 10.19 | 0.65 | 19.49 | 3.58 | 0.00 | 0.00 | 11.45 |
| Australia | 313.21 | 92.20 | 0.00 | 23.41 | 127.34 | 2.12 | 8.60 | 82.68 | 3.97 | 0.00 | 0.00 |
| Switzerland | 0.00 | 1.23 | 27.40 | 57.63 | 0.65 | 0.01 | 13.33 | 25.14 | 0.00 | 0.00 | 0.00 |
| Turkey | 132.98 | 185.55 | 0.00 | 97.02 | 68.65 | 0.46 | 10.19 | 4.36 | 2.72 | 0.00 | 9.62 |
| Taiwan | 235.11 | 133.77 | 34.89 | 13.07 | 16.94 | 3.96 | 4.61 | 14.42 | 0.00 | 0.00 | 0.00 |
| Norway | 0.26 | 4.86 | 0.00 | 200.05 | 14.82 | 0.01 | 2.10 | 0.42 | 0.00 | 0.00 | 0.00 |
| Indonesia | 481.02 | 102.14 | 0.00 | 32.89 | 0.09 | 10.33 | 62.01 | 1.52 | 0.00 | 0.00 | 28.86 |
| South Africa | 237.73 | 23.95 | 24.57 | 4.32 | 40.86 | 0.28 | 12.85 | 30.60 | 5.57 | 0.00 | 0.11 |
| RoW Asia and Pacific | 452.45 | 776.64 | 5.82 | 437.67 | 54.87 | 21.91 | 53.81 | 62.25 | 0.00 | 0.00 | 51.67 |
| RoW America | 52.15 | 437.19 | 26.94 | 541.55 | 62.22 | 63.78 | 46.43 | 42.66 | 4.16 | 0.00 | 20.90 |
| RoW Europe | 322.27 | 301.67 | 107.26 | 85.84 | 9.03 | 0.95 | 5.17 | 21.99 | 0.00 | 0.01 | 14.05 |
| RoW Africa | 186.50 | 785.16 | 19.18 | 347.05 | 44.02 | 112.27 | 15.83 | 77.46 | 14.07 | 0.00 | 45.10 |
| RoW Middle East | 31.55 | 1567.89 | 88.38 | 35.59 | 64.62 | 309.53 | 16.88 | 195.43 | 18.10 | 0.00 | 0.00 |
| World | 12923.05 | 10185.53 | 3596.79 | 5922.83 | 4258.37 | 603.14 | 1256.15 | 3658.28 | 104.07 | 27.72 | 257.57 |

**Table S2 global and regional energy mix of electricity production in 2040 under SPS (TWh).**

| **Economies** | **Coal** | **Gas** | **Nuclear** | **Hydro** | **Wind** | **Petroleum** | **Biomass** | **PV** | **Solar thermal** | **Marine** | **Geothermal** |
| --- | --- | --- | --- | --- | --- | --- | --- | --- | --- | --- | --- |
| Austria | 0.40 | 8.19 | 0.00 | 45.97 | 19.85 | 0.17 | 7.87 | 3.03 | 0.00 | 0.00 | 0.00 |
| Belgium | 0.33 | 24.03 | 18.10 | 1.61 | 22.87 | 0.04 | 9.62 | 9.86 | 0.00 | 0.00 | 0.00 |
| Bulgaria | 1.77 | 1.96 | 10.67 | 6.97 | 5.95 | 0.04 | 0.47 | 4.47 | 0.00 | 0.00 | 0.00 |
| Cyprus | 0.00 | 0.00 | 0.00 | 0.00 | 0.91 | 0.81 | 0.09 | 0.41 | 0.00 | 0.00 | 0.00 |
| Czech Republic | 3.44 | 2.38 | 18.62 | 3.48 | 2.35 | 0.02 | 8.36 | 7.31 | 0.00 | 0.00 | 0.00 |
| Germany | 22.28 | 66.37 | 63.67 | 28.24 | 324.95 | 1.21 | 87.89 | 125.07 | 0.00 | 0.00 | 0.30 |
| Denmark | 0.56 | 1.92 | 0.00 | 0.02 | 57.98 | 0.06 | 7.33 | 1.95 | 0.00 | 0.00 | 0.00 |
| Estonia | 0.68 | 0.06 | 0.00 | 0.03 | 2.93 | 0.03 | 1.33 | 0.02 | 0.00 | 0.00 | 0.00 |
| Spain | 4.14 | 55.29 | 39.75 | 35.58 | 202.36 | 3.36 | 10.07 | 26.70 | 21.63 | 0.02 | 0.00 |
| Finland | 0.69 | 5.48 | 16.13 | 19.02 | 9.55 | 0.04 | 19.95 | 0.03 | 0.00 | 0.00 | 0.00 |
| France | 0.96 | 20.84 | 303.42 | 68.51 | 87.46 | 0.42 | 11.16 | 25.03 | 0.00 | 27.04 | 0.20 |
| Greece | 1.74 | 9.57 | 0.00 | 6.98 | 18.96 | 1.10 | 0.40 | 12.59 | 0.00 | 0.00 | 0.00 |
| Croatia | 0.18 | 1.26 | 0.00 | 7.44 | 3.27 | 0.04 | 0.46 | 0.19 | 0.00 | 0.00 | 0.00 |
| Hungary | 0.46 | 5.38 | 10.98 | 0.27 | 2.84 | 0.02 | 3.77 | 0.46 | 0.00 | 0.00 | 0.00 |
| Ireland | 0.58 | 13.03 | 0.00 | 1.24 | 26.97 | 0.08 | 0.83 | 0.01 | 0.00 | 0.00 | 0.00 |
| Italy | 3.57 | 116.76 | 0.00 | 53.27 | 60.90 | 2.61 | 33.88 | 74.10 | 0.05 | 0.01 | 13.65 |
| Lithuania | 0.00 | 2.09 | 0.00 | 1.16 | 3.32 | 0.05 | 0.78 | 0.24 | 0.00 | 0.00 | 0.00 |
| Luxembourg | 0.00 | 0.87 | 0.00 | 1.74 | 0.42 | 0.00 | 0.22 | 0.33 | 0.00 | 0.00 | 0.00 |
| Latvia | 0.00 | 2.91 | 0.00 | 2.11 | 0.60 | 0.00 | 1.34 | 0.00 | 0.00 | 0.00 | 0.00 |
| Malta | 0.00 | 0.00 | 0.00 | 0.00 | 0.00 | 0.23 | 0.01 | 0.31 | 0.00 | 0.00 | 0.00 |
| Netherlands | 3.34 | 49.02 | 2.83 | 0.11 | 30.97 | 0.28 | 8.62 | 3.58 | 0.00 | 0.11 | 0.00 |
| Poland | 10.44 | 6.73 | 0.00 | 2.76 | 44.55 | 0.41 | 17.58 | 0.18 | 0.00 | 0.00 | 0.00 |
| Portugal | 1.16 | 11.12 | 0.00 | 11.11 | 47.62 | 0.26 | 5.42 | 2.57 | 0.00 | 0.00 | 0.45 |
| Romania | 1.43 | 9.89 | 8.07 | 19.29 | 28.98 | 0.09 | 0.91 | 6.40 | 0.00 | 0.00 | 0.00 |
| Sweden | 0.10 | 0.45 | 39.09 | 85.57 | 66.74 | 0.05 | 18.80 | 0.31 | 0.00 | 0.01 | 0.00 |
| Slovenia | 0.34 | 0.42 | 3.92 | 4.64 | 0.02 | 0.00 | 0.47 | 0.89 | 0.00 | 0.00 | 0.00 |
| Slovakia | 0.26 | 1.69 | 10.51 | 4.69 | 0.02 | 0.07 | 2.90 | 1.63 | 0.00 | 0.00 | 0.00 |
| United Kingdom | 6.03 | 105.35 | 48.80 | 10.25 | 165.23 | 0.42 | 51.10 | 24.33 | 0.00 | 0.11 | 0.00 |
| United States | 749.41 | 1803.35 | 563.67 | 331.16 | 728.20 | 7.17 | 109.77 | 583.63 | 16.11 | 4.36 | 40.80 |
| Japan | 218.34 | 250.89 | 218.54 | 97.24 | 52.71 | 7.53 | 70.67 | 113.28 | 0.00 | 5.83 | 6.62 |
| China | 4979.20 | 877.06 | 968.92 | 1607.16 | 1601.62 | 2.55 | 381.51 | 1593.80 | 45.19 | 1.95 | 12.49 |
| Canada | 5.01 | 115.65 | 107.34 | 464.94 | 103.20 | 0.95 | 21.09 | 85.72 | 0.55 | 2.70 | 0.00 |
| South Korea | 355.14 | 204.60 | 157.62 | 12.21 | 19.71 | 3.80 | 9.63 | 96.75 | 0.00 | 5.72 | 0.00 |
| Brazil | 15.28 | 80.81 | 46.99 | 573.46 | 138.69 | 4.65 | 75.29 | 36.81 | 3.28 | 0.00 | 0.00 |
| India | 2132.89 | 163.67 | 223.67 | 328.44 | 524.71 | 15.95 | 122.93 | 1052.84 | 13.78 | 0.75 | 1.46 |
| Mexico | 2.57 | 320.62 | 12.26 | 37.48 | 34.12 | 3.68 | 2.23 | 7.28 | 0.55 | 0.00 | 9.33 |
| Russia | 132.63 | 631.07 | 244.99 | 225.50 | 54.98 | 0.66 | 32.53 | 4.25 | 0.00 | 0.00 | 18.57 |
| Australia | 238.09 | 87.36 | 0.00 | 28.33 | 168.43 | 2.06 | 12.95 | 122.16 | 6.33 | 0.00 | 0.00 |
| Switzerland | 0.00 | 1.20 | 30.06 | 58.43 | 0.87 | 0.01 | 16.07 | 30.63 | 0.00 | 0.00 | 0.00 |
| Turkey | 100.47 | 180.01 | 0.00 | 98.38 | 92.58 | 0.46 | 12.28 | 5.31 | 3.21 | 0.00 | 11.04 |
| Taiwan | 178.72 | 126.75 | 34.89 | 15.82 | 22.40 | 3.85 | 6.95 | 21.31 | 0.00 | 0.00 | 0.00 |
| Norway | 0.20 | 4.72 | 0.00 | 202.86 | 19.98 | 0.01 | 2.53 | 0.51 | 0.00 | 0.00 | 0.00 |
| Indonesia | 370.62 | 105.60 | 0.00 | 40.67 | 0.16 | 9.66 | 71.63 | 3.85 | 0.00 | 0.00 | 36.49 |
| South Africa | 142.93 | 23.28 | 24.57 | 5.71 | 81.41 | 0.28 | 15.99 | 41.23 | 8.44 | 0.00 | 0.23 |
| RoW Asia and Pacific | 343.93 | 735.86 | 5.82 | 529.66 | 72.58 | 21.33 | 81.01 | 91.97 | 0.00 | 0.00 | 66.45 |
| RoW America | 30.94 | 338.46 | 26.94 | 553.00 | 72.10 | 63.04 | 49.52 | 60.85 | 4.43 | 0.00 | 23.32 |
| RoW Europe | 243.47 | 292.65 | 117.69 | 87.05 | 12.18 | 0.95 | 6.24 | 26.80 | 0.00 | 0.00 | 16.13 |
| RoW Africa | 97.35 | 628.22 | 19.18 | 342.60 | 77.86 | 77.77 | 24.48 | 200.14 | 25.47 | 0.00 | 58.77 |
| RoW Middle East | 28.47 | 1404.12 | 77.58 | 35.77 | 108.98 | 251.45 | 22.34 | 193.39 | 47.05 | 0.00 | 0.05 |
| World | 10430.53 | 8899.01 | 3475.29 | 6097.92 | 5226.06 | 489.72 | 1459.27 | 4704.51 | 196.06 | 48.62 | 316.36 |

**Table S3 global and regional energy mix of electricity production in 2040 under SDS (TWh).**

| **Economies** | **Coal** | **Gas** | **Nuclear** | **Hydro** | **Wind** | **Petroleum** | **Biomass** | **PV** | **Solar thermal** | **Marine** | **Geothermal** |
| --- | --- | --- | --- | --- | --- | --- | --- | --- | --- | --- | --- |
| Austria | 0.29 | 6.29 | 0.00 | 46.60 | 25.20 | 0.12 | 9.39 | 3.72 | 0.00 | 0.00 | 0.00 |
| Belgium | 0.25 | 18.45 | 20.84 | 1.63 | 29.03 | 0.03 | 11.49 | 12.12 | 0.00 | 0.00 | 0.00 |
| Bulgaria | 1.30 | 1.50 | 12.28 | 7.07 | 7.56 | 0.03 | 0.56 | 5.49 | 0.00 | 0.00 | 0.00 |
| Cyprus | 0.00 | 0.00 | 0.00 | 0.00 | 1.16 | 0.59 | 0.11 | 0.50 | 0.00 | 0.00 | 0.00 |
| Czech Republic | 2.54 | 1.83 | 21.44 | 3.53 | 2.98 | 0.01 | 9.99 | 8.99 | 0.00 | 0.00 | 0.00 |
| Germany | 16.42 | 50.94 | 73.31 | 28.63 | 412.57 | 0.88 | 104.93 | 153.73 | 0.00 | 0.00 | 0.40 |
| Denmark | 0.41 | 1.47 | 0.00 | 0.02 | 73.62 | 0.04 | 8.75 | 2.40 | 0.00 | 0.00 | 0.00 |
| Estonia | 0.50 | 0.05 | 0.00 | 0.03 | 3.72 | 0.02 | 1.58 | 0.02 | 0.00 | 0.00 | 0.00 |
| Spain | 3.05 | 42.44 | 45.77 | 36.07 | 256.92 | 2.44 | 12.02 | 32.81 | 34.81 | 0.02 | 0.00 |
| Finland | 0.51 | 4.20 | 18.57 | 19.28 | 12.12 | 0.03 | 23.81 | 0.04 | 0.00 | 0.00 | 0.00 |
| France | 0.70 | 16.00 | 349.35 | 69.46 | 111.05 | 0.31 | 13.32 | 30.77 | 0.00 | 35.26 | 0.28 |
| Greece | 1.28 | 7.35 | 0.00 | 7.07 | 24.07 | 0.80 | 0.48 | 15.48 | 0.00 | 0.00 | 0.00 |
| Croatia | 0.13 | 0.97 | 0.00 | 7.54 | 4.15 | 0.03 | 0.55 | 0.23 | 0.00 | 0.00 | 0.00 |
| Hungary | 0.34 | 4.13 | 12.64 | 0.27 | 3.61 | 0.01 | 4.51 | 0.56 | 0.00 | 0.00 | 0.00 |
| Ireland | 0.43 | 10.00 | 0.00 | 1.26 | 34.24 | 0.06 | 0.99 | 0.01 | 0.00 | 0.00 | 0.00 |
| Italy | 2.63 | 89.61 | 0.00 | 54.01 | 77.32 | 1.90 | 40.44 | 91.07 | 0.08 | 0.01 | 18.65 |
| Lithuania | 0.00 | 1.60 | 0.00 | 1.18 | 4.22 | 0.04 | 0.93 | 0.29 | 0.00 | 0.00 | 0.00 |
| Luxembourg | 0.00 | 0.67 | 0.00 | 1.76 | 0.53 | 0.00 | 0.26 | 0.41 | 0.00 | 0.00 | 0.00 |
| Latvia | 0.00 | 2.23 | 0.00 | 2.14 | 0.77 | 0.00 | 1.60 | 0.00 | 0.00 | 0.00 | 0.00 |
| Malta | 0.00 | 0.00 | 0.00 | 0.00 | 0.00 | 0.17 | 0.01 | 0.38 | 0.00 | 0.00 | 0.00 |
| Netherlands | 2.46 | 37.62 | 3.26 | 0.11 | 39.33 | 0.20 | 10.29 | 4.40 | 0.00 | 0.14 | 0.00 |
| Poland | 7.70 | 5.17 | 0.00 | 2.80 | 56.56 | 0.30 | 20.98 | 0.22 | 0.00 | 0.00 | 0.00 |
| Portugal | 0.85 | 8.54 | 0.00 | 11.27 | 60.46 | 0.19 | 6.47 | 3.16 | 0.00 | 0.00 | 0.61 |
| Romania | 1.06 | 7.59 | 9.30 | 19.56 | 36.79 | 0.07 | 1.09 | 7.87 | 0.00 | 0.00 | 0.00 |
| Sweden | 0.07 | 0.35 | 45.00 | 86.75 | 84.74 | 0.04 | 22.45 | 0.39 | 0.00 | 0.01 | 0.00 |
| Slovenia | 0.25 | 0.32 | 4.51 | 4.70 | 0.03 | 0.00 | 0.56 | 1.09 | 0.00 | 0.00 | 0.00 |
| Slovakia | 0.19 | 1.29 | 12.10 | 4.76 | 0.03 | 0.05 | 3.47 | 2.01 | 0.00 | 0.00 | 0.00 |
| United Kingdom | 4.44 | 80.85 | 56.18 | 10.39 | 209.78 | 0.30 | 61.01 | 29.90 | 0.00 | 0.14 | 0.00 |
| United States | 59.32 | 1076.08 | 756.79 | 350.93 | 1380.38 | 5.60 | 218.98 | 877.31 | 146.08 | 11.70 | 70.67 |
| Japan | 25.10 | 162.55 | 275.34 | 139.20 | 139.19 | 4.08 | 73.58 | 129.90 | 0.00 | 10.54 | 25.56 |
| China | 1744.17 | 643.50 | 1271.83 | 1733.09 | 2203.43 | 0.63 | 576.78 | 2549.36 | 156.76 | 0.94 | 18.12 |
| Canada | 7.31 | 45.24 | 107.34 | 479.18 | 161.96 | 0.12 | 28.76 | 130.74 | 4.19 | 2.94 | 0.00 |
| South Korea | 46.37 | 137.13 | 253.07 | 16.40 | 50.58 | 2.91 | 14.62 | 192.06 | 0.00 | 9.40 | 0.00 |
| Brazil | 0.00 | 28.16 | 46.99 | 510.99 | 148.30 | 0.27 | 72.56 | 43.01 | 3.28 | 0.00 | 0.00 |
| India | 266.36 | 729.12 | 251.00 | 374.95 | 740.34 | 14.91 | 216.66 | 1235.85 | 104.77 | 1.14 | 4.64 |
| Mexico | 3.74 | 125.42 | 12.26 | 38.62 | 53.56 | 0.48 | 3.04 | 11.11 | 4.19 | 0.00 | 9.87 |
| Russia | 3.28 | 245.69 | 284.11 | 320.46 | 107.86 | 0.63 | 121.04 | 10.59 | 0.00 | 0.59 | 35.62 |
| Australia | 31.09 | 58.55 | 0.00 | 38.04 | 432.17 | 1.58 | 19.67 | 242.51 | 13.10 | 0.00 | 0.01 |
| Switzerland | 0.00 | 0.53 | 33.29 | 73.04 | 2.16 | 0.01 | 45.13 | 67.33 | 0.00 | 0.00 | 0.00 |
| Turkey | 1.35 | 78.98 | 0.00 | 122.98 | 229.16 | 0.23 | 34.49 | 11.68 | 9.25 | 0.00 | 14.13 |
| Taiwan | 23.33 | 84.95 | 56.02 | 21.23 | 57.48 | 2.94 | 10.55 | 42.30 | 0.00 | 0.00 | 0.00 |
| Norway | 0.00 | 2.07 | 0.00 | 253.57 | 49.46 | 0.00 | 7.11 | 1.13 | 0.00 | 0.00 | 0.00 |
| Indonesia | 32.19 | 77.92 | 0.00 | 59.14 | 0.97 | 5.16 | 100.72 | 9.97 | 0.00 | 0.00 | 87.37 |
| South Africa | 28.01 | 16.65 | 38.81 | 5.70 | 92.17 | 0.27 | 16.02 | 51.71 | 10.20 | 0.11 | 0.45 |
| RoW Asia and Pacific | 44.91 | 493.20 | 9.34 | 711.04 | 186.22 | 16.31 | 123.02 | 182.57 | 0.00 | 0.00 | 140.77 |
| RoW America | 1.50 | 111.88 | 35.00 | 646.14 | 125.45 | 9.54 | 60.63 | 85.29 | 14.85 | 1.19 | 29.46 |
| RoW Europe | 3.28 | 128.41 | 130.33 | 108.81 | 30.15 | 0.47 | 17.51 | 58.91 | 0.00 | 0.00 | 20.64 |
| RoW Africa | 46.86 | 233.80 | 37.53 | 458.30 | 159.81 | 63.66 | 32.52 | 504.37 | 102.11 | 0.44 | 74.62 |
| RoW Middle East | 12.16 | 702.90 | 125.23 | 43.87 | 371.25 | 58.76 | 31.00 | 362.36 | 201.27 | 0.51 | 0.06 |
| World | 2428.15 | 5584.16 | 4408.84 | 6933.57 | 8294.60 | 197.22 | 2196.44 | 7208.10 | 804.94 | 75.09 | 551.92 |

**Table S4 GDP per capita for each country or region**

| **Economies** | **2015GDP $** | **2015 population** | **GDP per capita** | **Category** |
| --- | --- | --- | --- | --- |
| Luxembourg | 52045478103 | 569604 | 91371.34 | Developed |
| Switzerland | 6.12738E+11 | 8282396 | 73980.71 | Developed |
| Norway | 3.47726E+11 | 5188607 | 67017.14 | Developed |
| Ireland | 2.62731E+11 | 4701957 | 55876.9 | Developed |
| United States | 1.64212E+13 | 3.21E+08 | 51197.36 | Developed |
| Australia | 1.21829E+12 | 23815995 | 51154.32 | Developed |
| Denmark | 2.72801E+11 | 5683483 | 47998.97 | Developed |
| Sweden | 4.55254E+11 | 9799186 | 46458.3 | Developed |
| Netherlands | 6.89739E+11 | 16939923 | 40716.75 | Developed |
| United Kingdom | 2.63956E+12 | 65128861 | 40528.26 | Developed |
| Austria | 3.44135E+11 | 8642699 | 39817.98 | Developed |
| Canada | 1.40255E+12 | 35702908 | 39283.92 | Developed |
| Finland | 2.11302E+11 | 5479531 | 38562.14 | Developed |
| Germany | 3.02889E+12 | 81686611 | 37079.36 | Developed |
| Belgium | 4.16539E+11 | 11274196 | 36946.2 | Developed |
| France | 2.19757E+12 | 66593366 | 32999.89 | Developed |
| Japan | 3.95626E+12 | 1.27E+08 | 31117.14 | Developed |
| Italy | 1.65471E+12 | 60730582 | 27246.71 | Developed |
| South Korea | 1.32111E+12 | 51014947 | 25896.56 | Developed |
| Spain | 1.07717E+12 | 46444832 | 23192.45 | Developed |
| Malta | 9628116267 | 445053 | 21633.64 | Developed |
| Taiwan | 4.71924E+11 | 23485755 | 20094.07 | Developed |
| Slovenia | 38837470087 | 2063531 | 18820.88 | Developed |
| Portugal | 1.79643E+11 | 10358076 | 17343.28 | Developed |
| Greece | 1.77189E+11 | 10820883 | 16374.74 | Developed |
| Czech Republic | 1.68391E+11 | 10546059 | 15967.21 | Developed |
| Estonia | 20774100264 | 1315407 | 15792.91 | Developed |
| Cyprus | 17827084377 | 1160985 | 15355.14 | Developed |
| Slovakia | 79727055182 | 5423801 | 14699.48 | Developed |
| Lithuania | 37307252418 | 2904910 | 12842.83 | Developing |
| Latvia | 24416421508 | 1977527 | 12346.95 | Developing |
| Hungary | 1.1224E+11 | 9843028 | 11402.95 | Developed |
| Poland | 4.30447E+11 | 37986412 | 11331.61 | Developing |
| Croatia | 44642308882 | 4203604 | 10620.01 | Developing |
| Turkey | 7.74941E+11 | 78529409 | 9868.161 | Developing |
| RoW Middle East | 2.14102E+12 | 2.36E+08 | 9081.342 | Developing |
| Mexico | 1.05504E+12 | 1.22E+08 | 8657.911 | Developing |
| Russia | 1.22891E+12 | 1.44E+08 | 8528.394 | Developing |
| Romania | 1.60337E+11 | 19815481 | 8091.481 | Developing |
| Brazil | 1.62435E+12 | 2.04E+08 | 7944.12 | Developing |
| China | 9.96985E+12 | 1.37E+09 | 7270.791 | Developing |
| RoW America | 1.99145E+12 | 3.04E+08 | 6547.353 | Developing |
| Bulgaria | 45633802543 | 7177991 | 6357.462 | Developing |
| South Africa | 2.86274E+11 | 55386367 | 5168.665 | Developing |
| RoW Europe | 2.47924E+11 | 74073476 | 3347.002 | Developing |
| RoW Asia and Pacific | 2.87528E+12 | 9.52E+08 | 3020.992 | Developing |
| Indonesia | 7.75894E+11 | 2.58E+08 | 3002.88 | Developing |
| RoW Africa | 1.82893E+12 | 1.12E+09 | 1625.776 | Developing |
| India | 1.89598E+12 | 1.31E+09 | 1447.143 | Developing |

**Table S5** **The effects of international trade on global power transition related SDGs score change between 2015 and 2040.**

| SDG indicators | CPS | SPS | SDS |
| --- | --- | --- | --- |
| SDG index | -0.19% | -0.14 | -0.13% |
| SDG 6.4 | -0.22% | -0.18% | -0.17% |
| SDG 8.4 | -0.11% | -0.09% | -0.07% |
| SDG 8.5 | 0.14% | 0.13% | 0.11% |
| SDG 9.4 | -0.33% | -0.24% | -0.22% |
| SDG 11.6 | -0.35% | -0.32% | -0.29% |
| SDG 12.2 | -0.11% | -0.09% | -0.07% |
| SDG 13.2 | -0.43% | -0.37% | -0.22% |

**Table S6 The effects of international trade on regional power transition related SDGs score change between 2015 and 2040 under SDS**

| **Economies** | **SDG 6.4** | | **SDG 8.5** | **SDG 8.4 and 12.2** | | | | **SDG 9.4 and 13.2** | **SDG 11.6** |
| --- | --- | --- | --- | --- | --- | --- | --- | --- | --- |
| **Blue Water**  **Consumption**  **(Mm3)** | **Blue water withdrawal**  **(Mm3)** | **Employment**  **(1000 P)** | **Fossil fuel use**  **(kt)** | **Biomass use**  **(kt)** | **Metal use**  **(kt)** | **Nonmetal use**  **(kt)** | **CO2 emissions**  **(t)** | **PM emissions** |
| **Austria** | 0.36 | 4.38 | 8.61 | 1.14E+02 | 25.07 | 411.61 | 262.85 | 2.10E+05 | 54.94 |
| **Belgium** | 3.28 | 23.76 | 20.57 | 0.00E+00 | 17.40 | 0.01 | 517.48 | 5.65E+05 | 222.32 |
| **Bulgaria** | 0.78 | 1.33 | 9.19 | -1.46E+03 | 16.61 | 111.17 | 107.51 | 4.58E+04 | -27.83 |
| **Cyprus** | 0.69 | 0.01 | 1.89 | 0.00E+00 | 0.25 | 0.00 | 32.22 | 8.14E+04 | 187.04 |
| **Czech Republic** | 0.17 | 0.37 | 9.41 | -1.54E+03 | 39.55 | 0.25 | 74.84 | 9.23E+03 | -147.04 |
| **Germany** | 4.47 | 30.48 | 89.43 | 8.17E+02 | 638.86 | 62.12 | 910.04 | 7.31E+06 | 1689.84 |
| **Denmark** | 0.26 | 0.09 | 5.83 | 2.27E+02 | 28.64 | 0.00 | 48.45 | 2.52E+05 | 301.57 |
| **Estonia** | 0.04 | 0.26 | 2.75 | 4.11E-01 | 16.61 | 0.00 | 39.27 | 7.02E+04 | 107.97 |
| **Spain** | 11.54 | 3.77 | 39.82 | -4.40E+02 | 65.27 | 54.44 | 185.33 | 1.78E+06 | 203.22 |
| **Finland** | 0.30 | 2.05 | 4.95 | 4.61E+00 | 52.71 | 21.20 | 60.42 | 1.62E+05 | 97.50 |
| **France** | 7.20 | 3.50 | 53.84 | 1.90E+01 | 365.83 | 0.32 | 493.35 | 2.64E+06 | 1195.04 |
| **Greece** | 5.43 | 0.72 | 7.52 | 2.64E+01 | 6.84 | 7.67 | 319.67 | 1.01E+06 | 2454.99 |
| **Croatia** | 0.22 | 0.65 | 4.15 | 5.40E+01 | 6.94 | 0.01 | 53.63 | 8.23E+04 | 72.44 |
| **Hungary** | 0.42 | 11.24 | 16.38 | -5.16E+01 | 54.17 | 0.46 | 235.21 | 1.33E+05 | 29.50 |
| **Ireland** | 0.77 | 1.87 | 14.33 | -8.17E+02 | 204.19 | 2.56 | 42.83 | 8.34E+05 | 298.36 |
| **Italy** | 5.87 | 28.31 | 38.63 | 2.22E+02 | 59.95 | 0.00 | 414.85 | 1.51E+06 | 728.60 |
| **Lithuania** | 0.31 | 0.48 | 6.86 | -3.99E+00 | 58.20 | 0.00 | 80.99 | 6.08E+04 | 81.49 |
| **Luxembourg** | 0.02 | 0.07 | 2.03 | 1.07E-02 | 9.21 | 0.00 | 3.29 | 2.81E+05 | 95.43 |
| **Latvia** | 0.12 | 0.28 | 3.56 | 1.58E+00 | 15.91 | 0.00 | 19.71 | 1.25E+05 | 107.48 |
| **Malta** | 0.01 | 0.00 | 0.99 | 0.00E+00 | 0.11 | 0.00 | 7.88 | 1.42E+04 | 8.83 |
| **Netherlands** | 5.80 | 107.32 | 26.28 | 8.48E+03 | 43.28 | 0.00 | 253.74 | 2.78E+06 | 316.02 |
| **Poland** | 1.54 | -7.40 | 16.83 | -1.43E+04 | 33.15 | 99.09 | 285.88 | -2.48E+05 | -456.12 |
| **Portugal** | 2.46 | 4.97 | 18.73 | 0.00E+00 | 67.42 | 2.86 | 498.36 | 6.32E+05 | 246.82 |
| **Romania** | 14.33 | 4.75 | 31.32 | 1.26E+02 | 15.84 | 2.31 | 110.52 | 1.79E+05 | 148.70 |
| **Sweden** | 3.65 | 3.32 | 13.89 | -6.02E-01 | 591.83 | 1771.79 | 24709.52 | 3.98E+05 | 290.01 |
| **Slovenia** | 0.04 | 0.91 | 1.77 | 4.29E+00 | 14.44 | 0.00 | 5.13 | 4.64E+04 | 39.56 |
| **Slovakia** | 0.41 | 1.53 | 7.49 | 1.50E+01 | 23.67 | 0.57 | 62.56 | 6.70E+04 | 2.23 |
| **United Kingdom** | 2.08 | 5.11 | 63.41 | 4.90E+02 | 244.20 | 0.05 | 182.14 | 3.41E+06 | 548.72 |
| **United States** | 55.77 | 88.21 | 111.27 | -8.57E+04 | 203.11 | 958.25 | 851.36 | 1.72E+07 | -2436.79 |
| **Japan** | -0.05 | -0.41 | 15.30 | 5.64E-01 | 0.38 | 1.45 | 58.15 | 7.08E+05 | 70.87 |
| **China** | 129.49 | 172.70 | 322.96 | 2.80E+03 | 825.12 | 2378.44 | 9717.85 | 5.08E+06 | 12844.65 |
| **Canada** | 1.66 | 23.19 | 22.99 | -5.27E+03 | 106.90 | 375.11 | 685.97 | 1.47E+06 | 577.77 |
| **South Korea** | 0.56 | 23.12 | 24.71 | 1.41E+00 | 1.72 | 4.58 | 180.58 | 1.54E+06 | 358.24 |
| **Brazil** | 8.05 | 4.02 | 74.36 | 3.51E+02 | 726.45 | 5611.43 | 207.28 | 3.46E+05 | 892.04 |
| **India** | 413.24 | 100.85 | 358.50 | 1.03E+03 | 460.78 | 632.46 | 4825.41 | 2.35E+06 | 1752.76 |
| **Mexico** | 21.60 | 1.18 | 33.70 | 6.18E+02 | 30.63 | 350.89 | 58.72 | 1.68E+05 | 397.72 |
| **Russia** | 57.08 | 9.44 | 107.84 | 1.19E+04 | 182.28 | 568.74 | 967.09 | 9.67E+06 | -9345.96 |
| **Australia** | 29.60 | 0.32 | 9.52 | -4.23E+04 | 116.42 | 3615.37 | 91.68 | -2.57E+05 | -1101.62 |
| **Switzerland** | 0.34 | 4.04 | 10.58 | 0.00E+00 | 51.50 | 0.00 | 119.69 | 2.16E+05 | 154.10 |
| **Turkey** | 36.85 | 9.03 | 32.44 | 2.02E+01 | 98.00 | 114.29 | 620.12 | 9.87E+05 | 704.06 |
| **Taiwan** | 0.38 | 2.92 | 13.03 | 3.01E-01 | 3.19 | 0.00 | 83.36 | 4.44E+05 | 209.09 |
| **Norway** | 1.43 | 6.58 | 9.67 | 9.02E+03 | 14.98 | 813.69 | 247.51 | 1.23E+06 | 1210.05 |
| **Indonesia** | 1.81 | 0.73 | 143.14 | -6.08E+04 | 29.20 | 1312.68 | 171.49 | -3.85E+06 | -6101.66 |
| **South Africa** | 19.32 | 2.72 | 29.47 | -7.76E+03 | 70.15 | 761.45 | 646.28 | 9.46E+05 | 471.25 |
| **RoW Asia and Pacific** | 624.76 | 173.49 | 1433.46 | -3.87E+03 | 3461.80 | 2053.23 | 3981.10 | 7.07E+06 | 5392.11 |
| **RoW America** | 62.42 | 19.55 | 116.94 | -4.31E+03 | 665.12 | 2909.31 | 560.95 | 5.60E+05 | 1224.51 |
| **RoW Europe** | 48.06 | 16.15 | 427.63 | -2.90E+03 | 342.42 | 142.68 | 165.13 | 8.93E+05 | 1431.60 |
| **RoW Africa** | 93.35 | 28.49 | 801.39 | 1.28E+04 | 2201.01 | 624.28 | 2245.86 | 1.88E+06 | 4318.58 |
| **RoW Middle East** | 141.80 | 53.30 | 53.00 | 1.74E+03 | 101.11 | 227.78 | 2586.99 | 4.25E+06 | 4417.54 |
